# Supplementary material for: Lorenz Atmospheric Energy Cycle in Climatic Projections
Source: MDPI journal article supplement (doi:10.3390/cli9120180), 2021-12-10
Supplement: s1 [file s1]

Figure S1

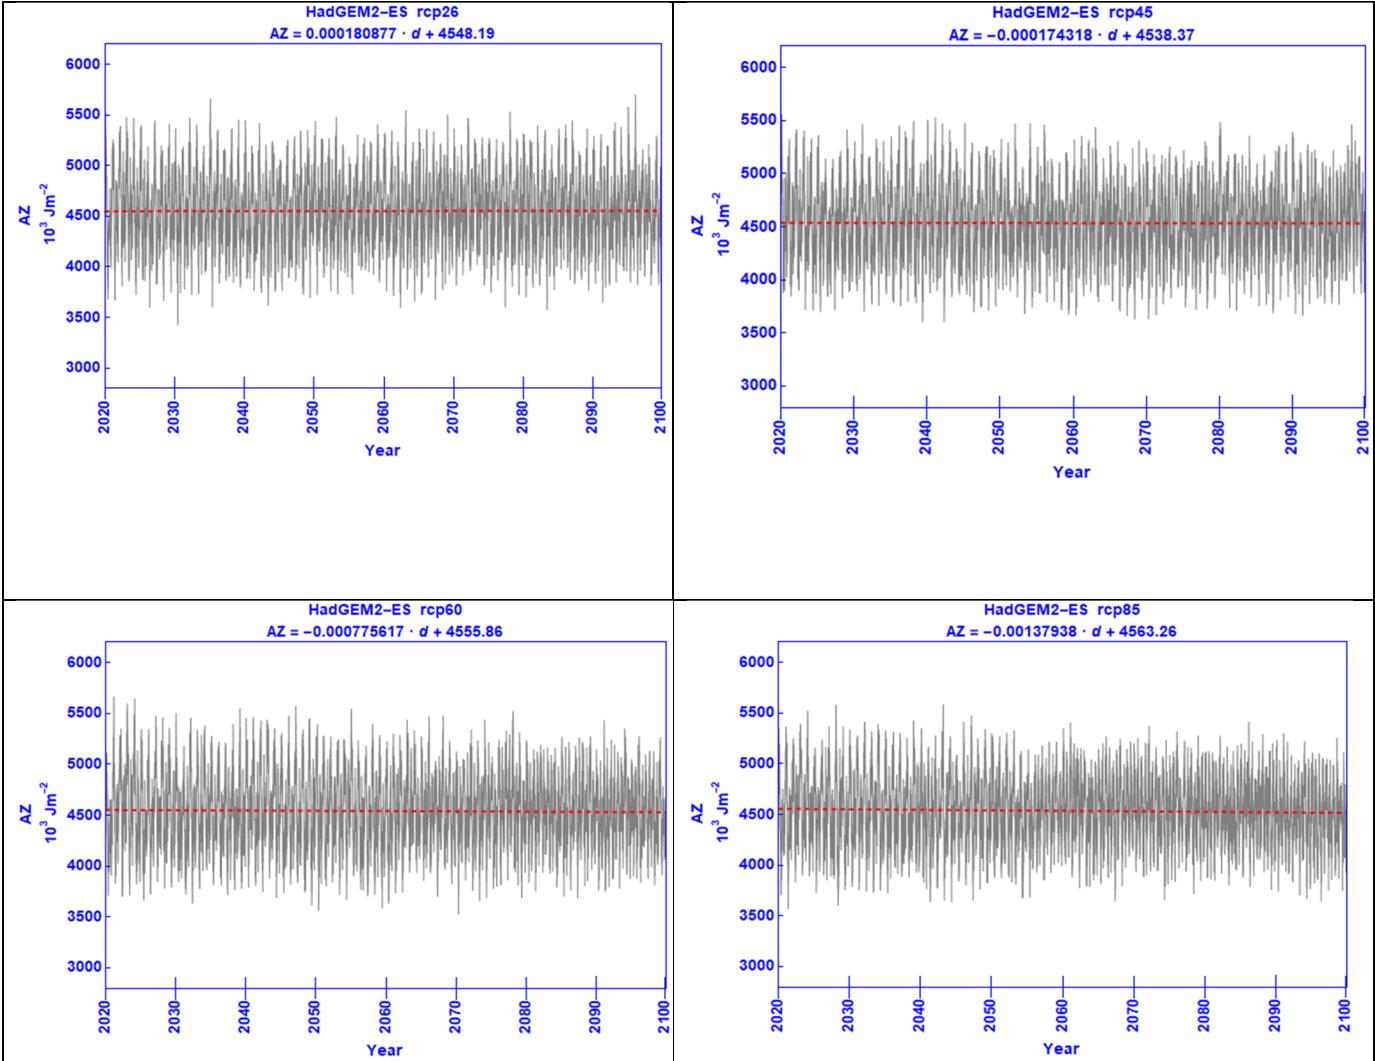

Time series for AZ corresponding to each Representative Concentration Pathway: rcp26 (top left), rcp45 (top right), rcp60 (bottom left, and rcp85 (bottom right). The fitted linear regression for this energy content is given at the top of each diagram as a function of day ( $d$ ).

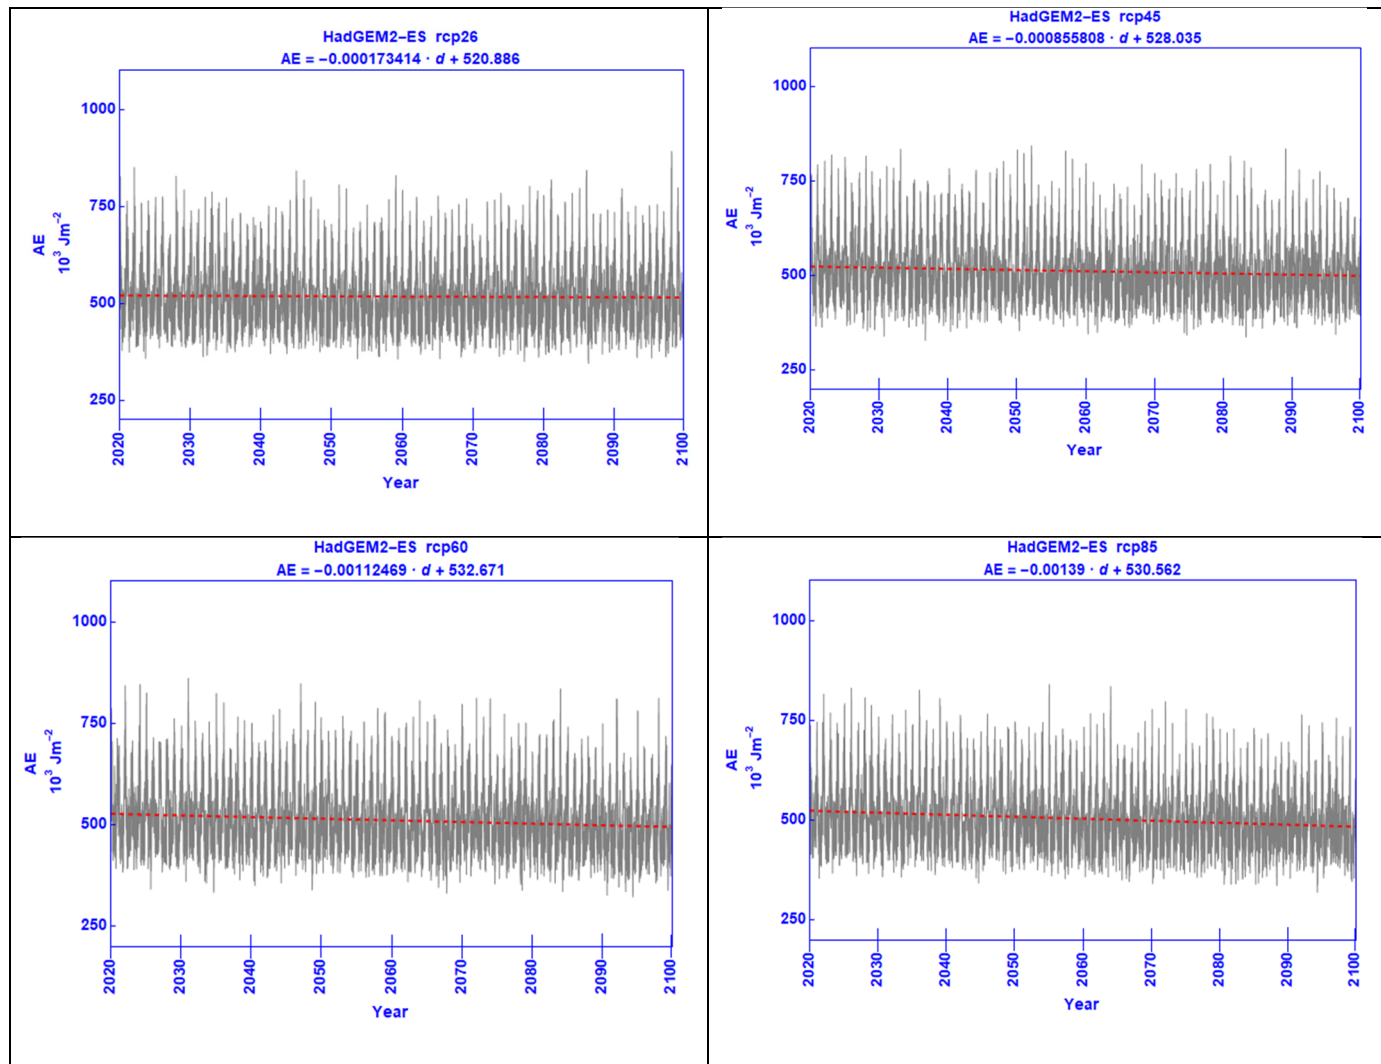

Time series for AE corresponding to each Representative Concentration Pathway: rcp26 (top left), rcp45 (top right), rcp60 (bottom left, and rcp85 (bottom right). The fitted linear regression for this energy content is given at the top of each diagram as a function of day ( $d$ ).

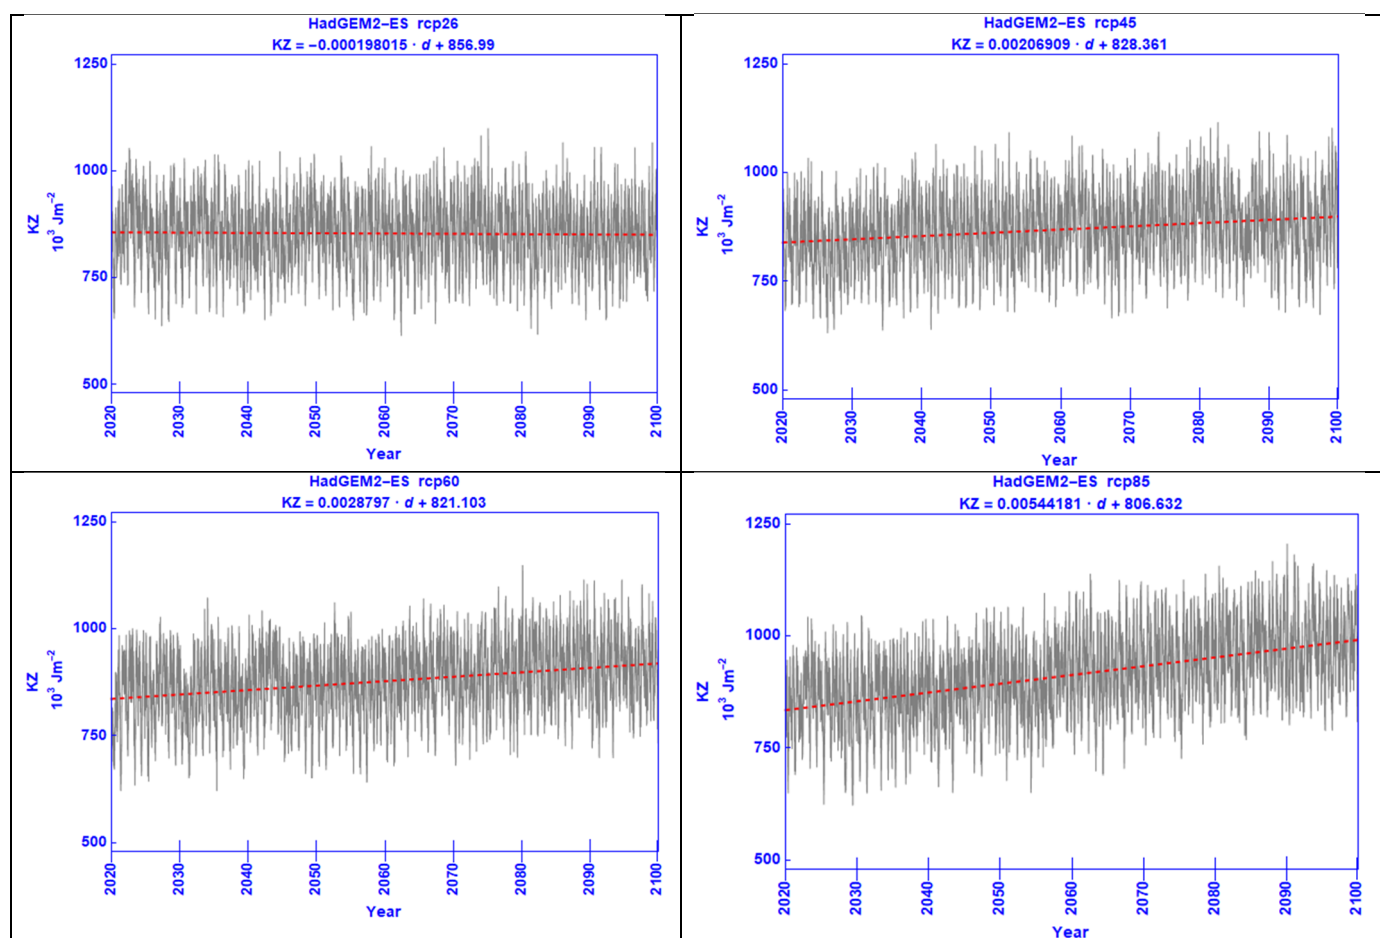

Time series for  $KZ$  corresponding to each Representative Concentration Pathway: rcp26 (top left), rcp45 (top right), rcp60 (bottom left, and rcp85 (bottom right). The fitted linear regression for this energy content is given at the top of each diagram as a function of day ( $d$ ).

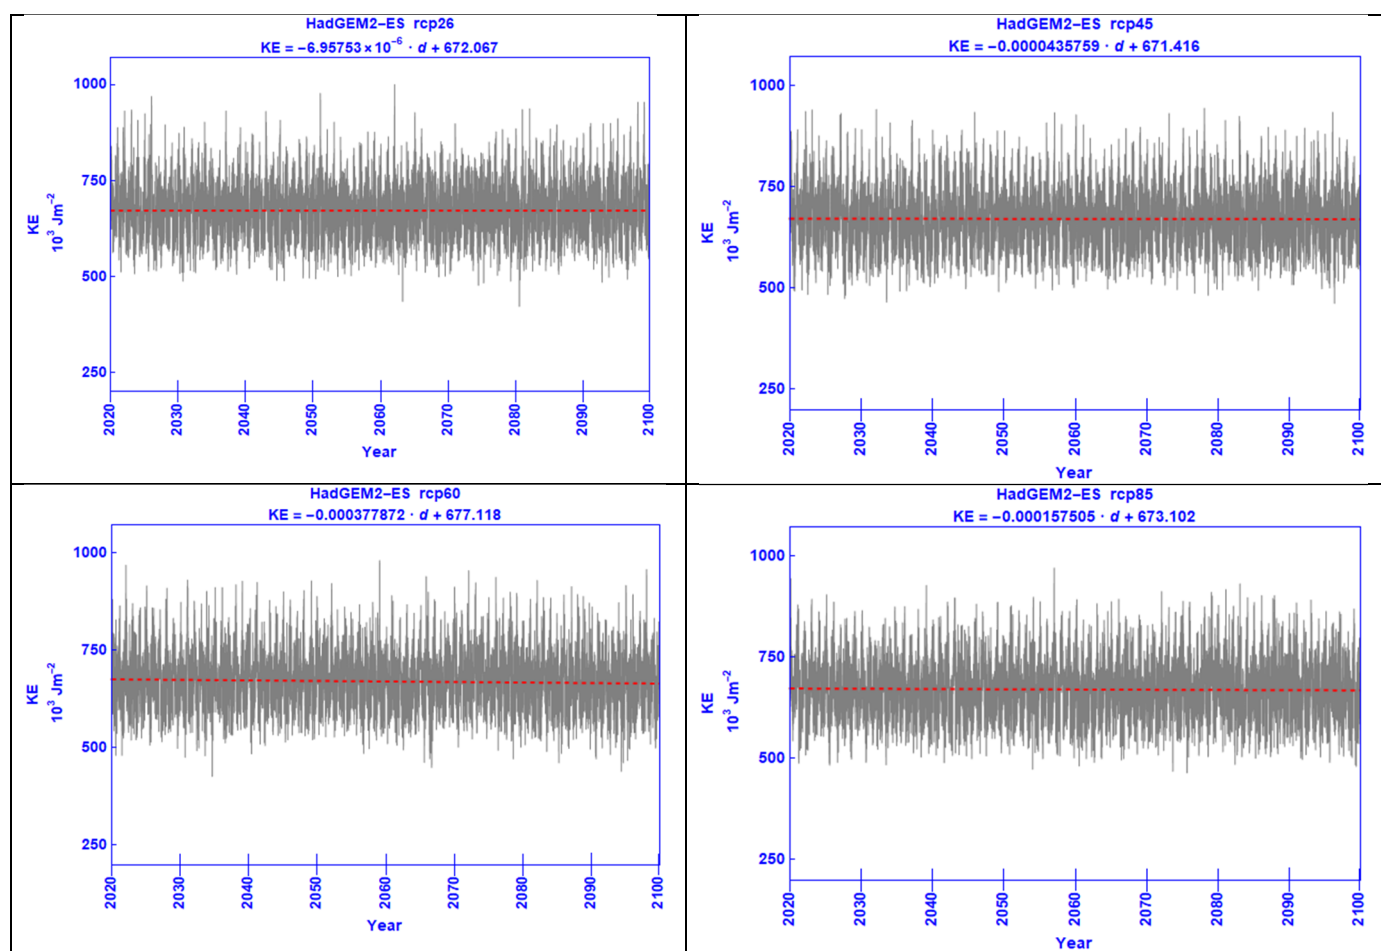

Time series for  $KE$  corresponding to each Representative Concentration Pathway: rcp26 (top left), rcp45 (top right), rcp60 (bottom left, and rcp85 (bottom right). The fitted linear regression for this energy content is given at the top of each diagram as a function of day ( $d$ ).



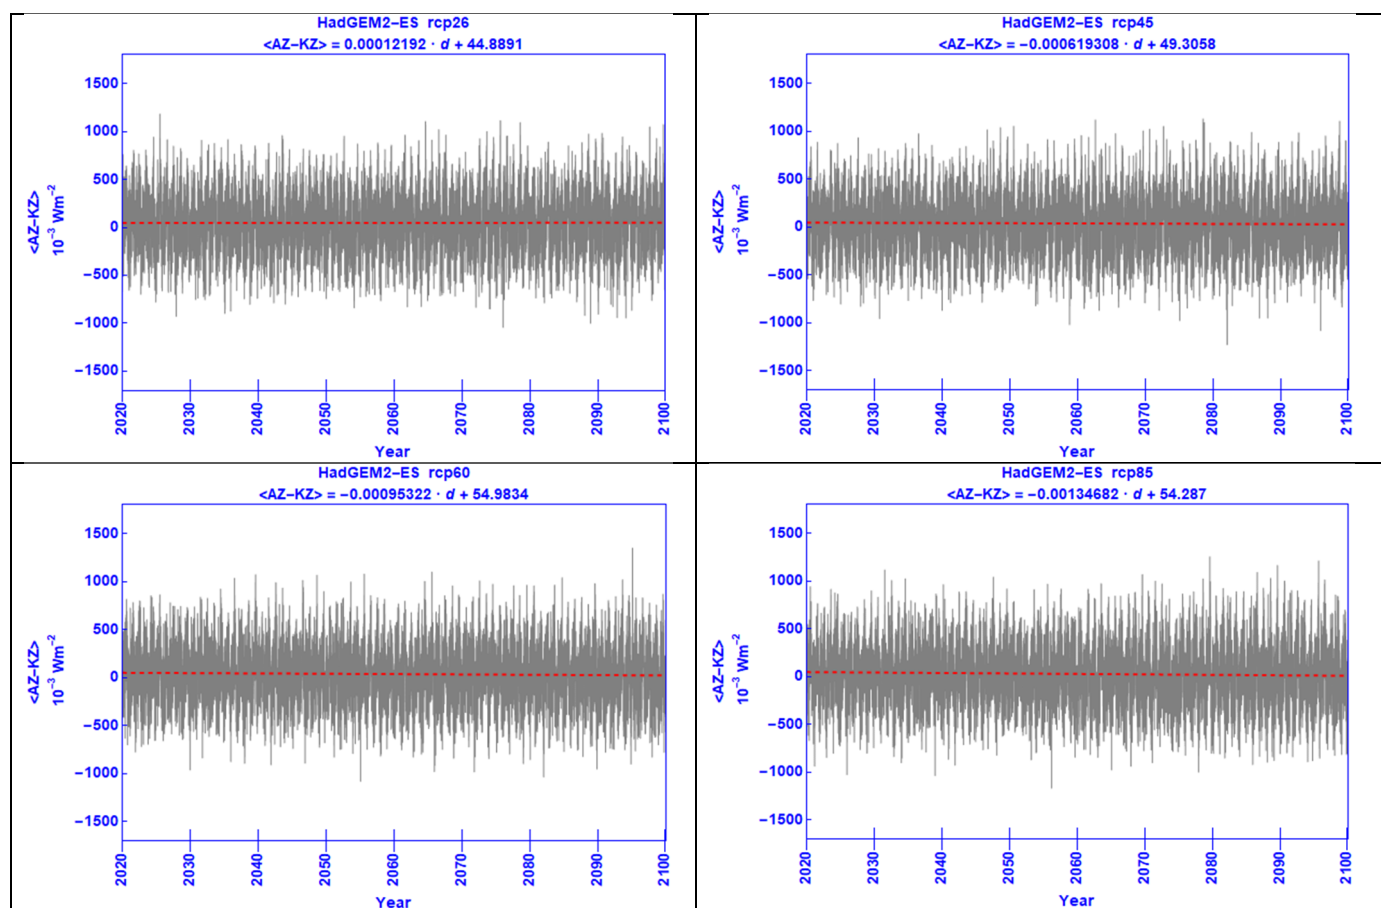

Time series for  $\langle \Delta Z \rightarrow KZ \rangle$  corresponding to each Representative Concentration Pathway: rcp26 (top left), rcp45 (top right), rcp60 (bottom left), and rcp85 (bottom right). The fitted linear regression for this energy conversion is given at the top of each diagram as a function of day ( $d$ ).

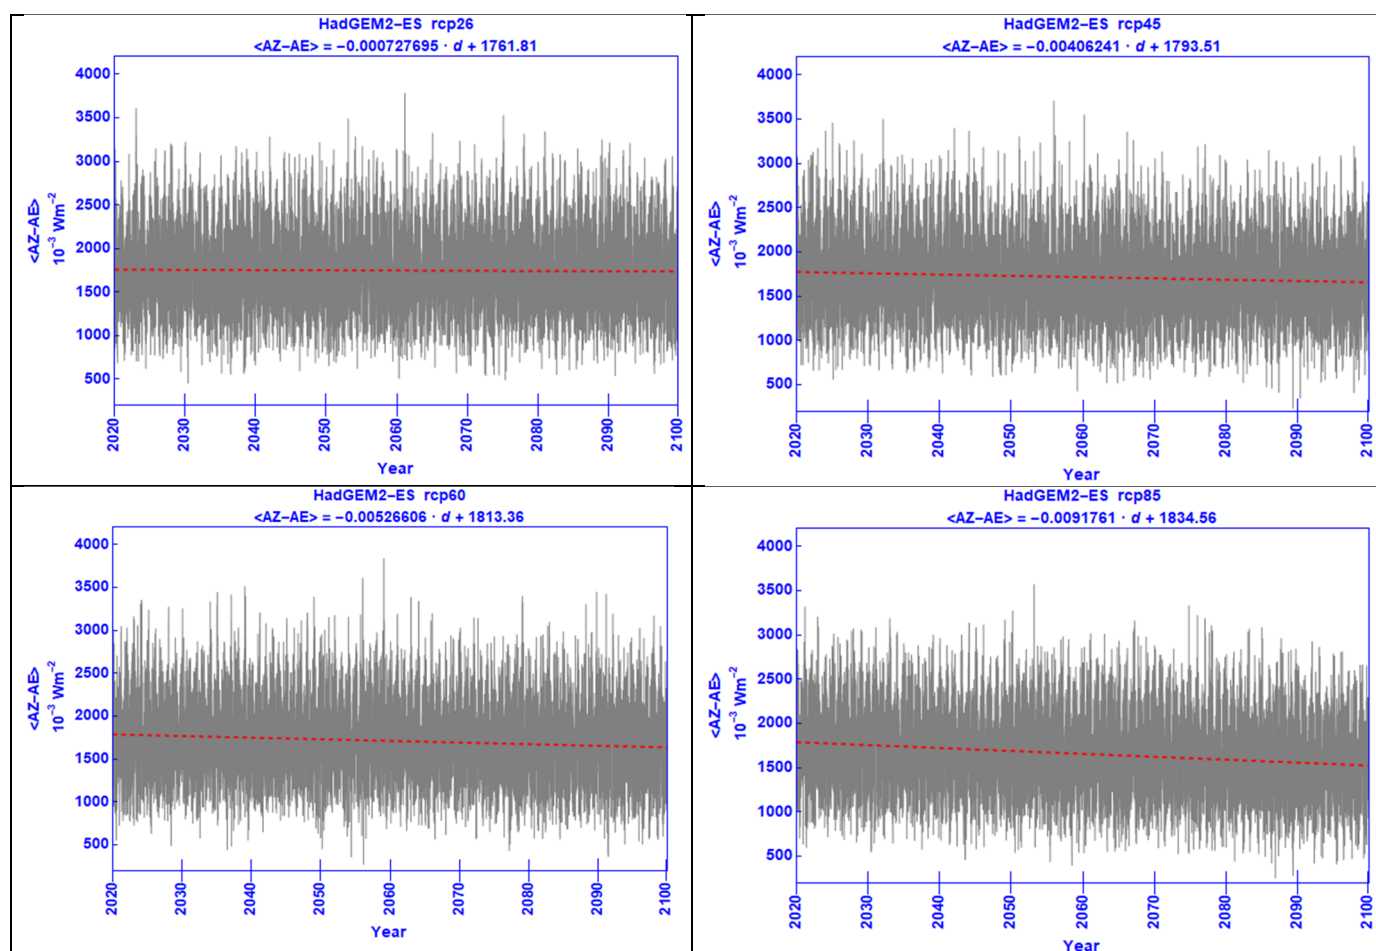

Time series for  $\langle AZ \rightarrow AE \rangle$  corresponding to each Representative Concentration Pathway: rcp26 (top left), rcp45 (top right), rcp60 (bottom left), and rcp85 (bottom right). The fitted linear regression for this energy conversion is given at the top of each diagram as a function of day ( $d$ ).

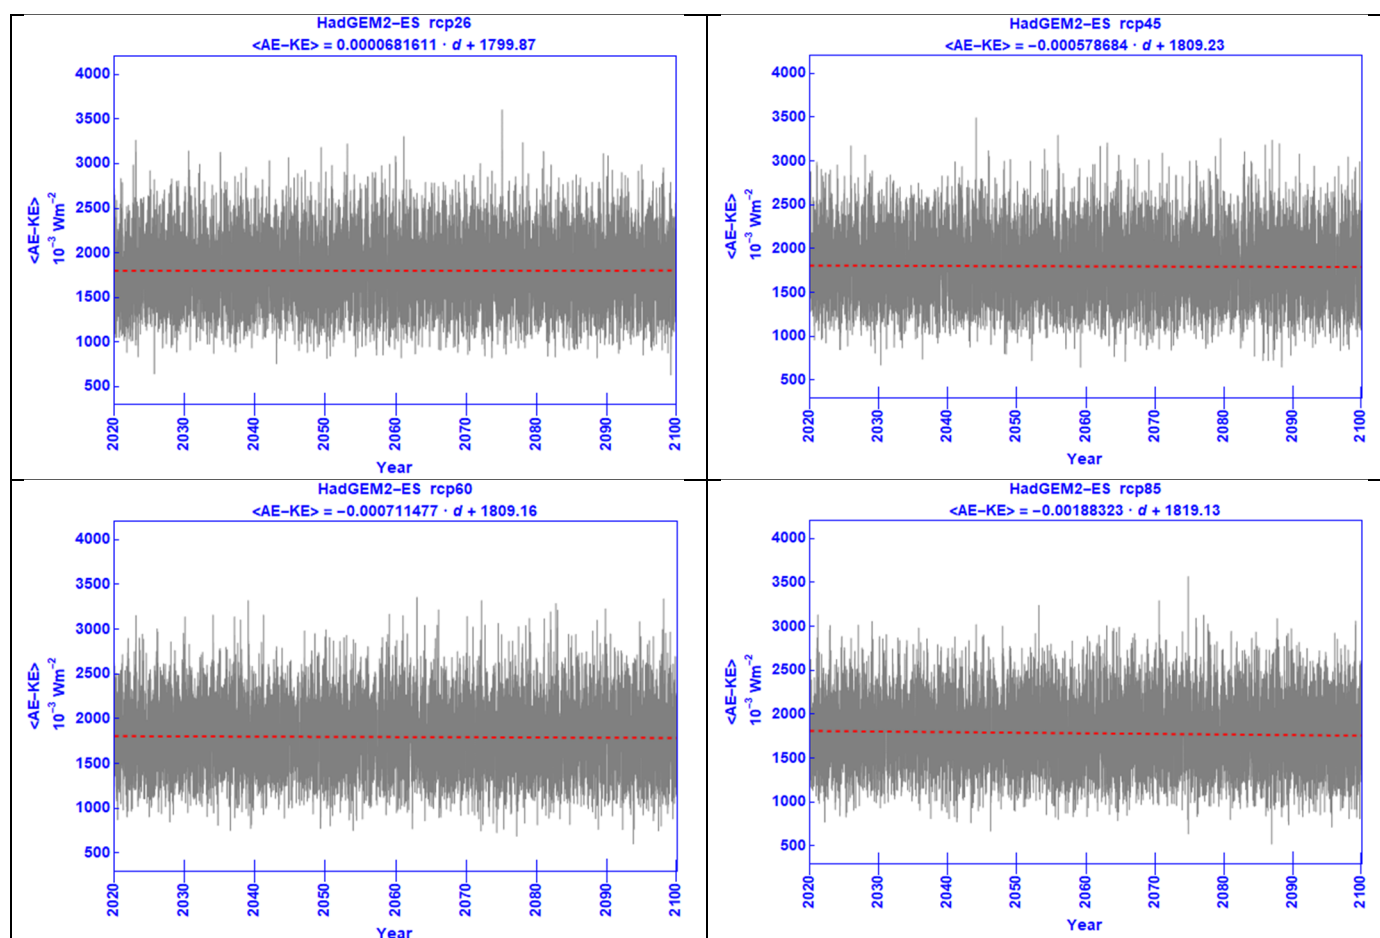

Time series for  $\langle AE \rightarrow KE \rangle$  corresponding to each Representative Concentration Pathway: rcp26 (top left), rcp45 (top right), rcp60 (bottom left, and rcp85 (bottom right). The fitted linear regression for this energy conversion is given at the top of each diagram as a function of day ( $d$ ).

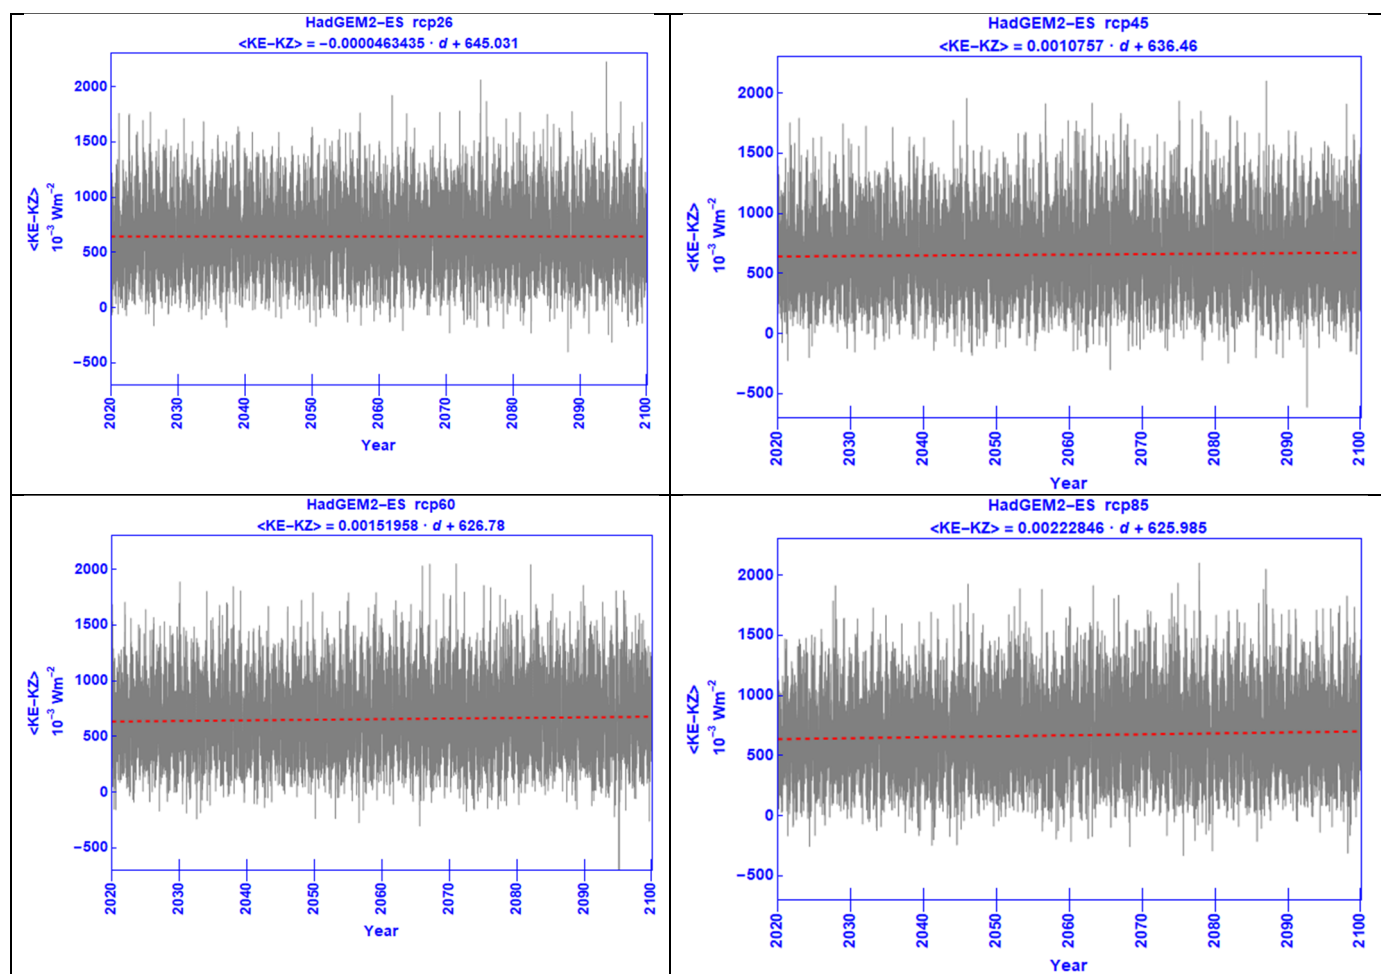

Time series for  $\langle KE \rightarrow KZ \rangle$  corresponding to each Representative Concentration Pathway: rcp26 (top left), rcp45 (top right), rcp60 (bottom left, and rcp85 (bottom right). The fitted linear regression for this energy conversion is given at the top of each diagram as a function of day ( $d$ ).

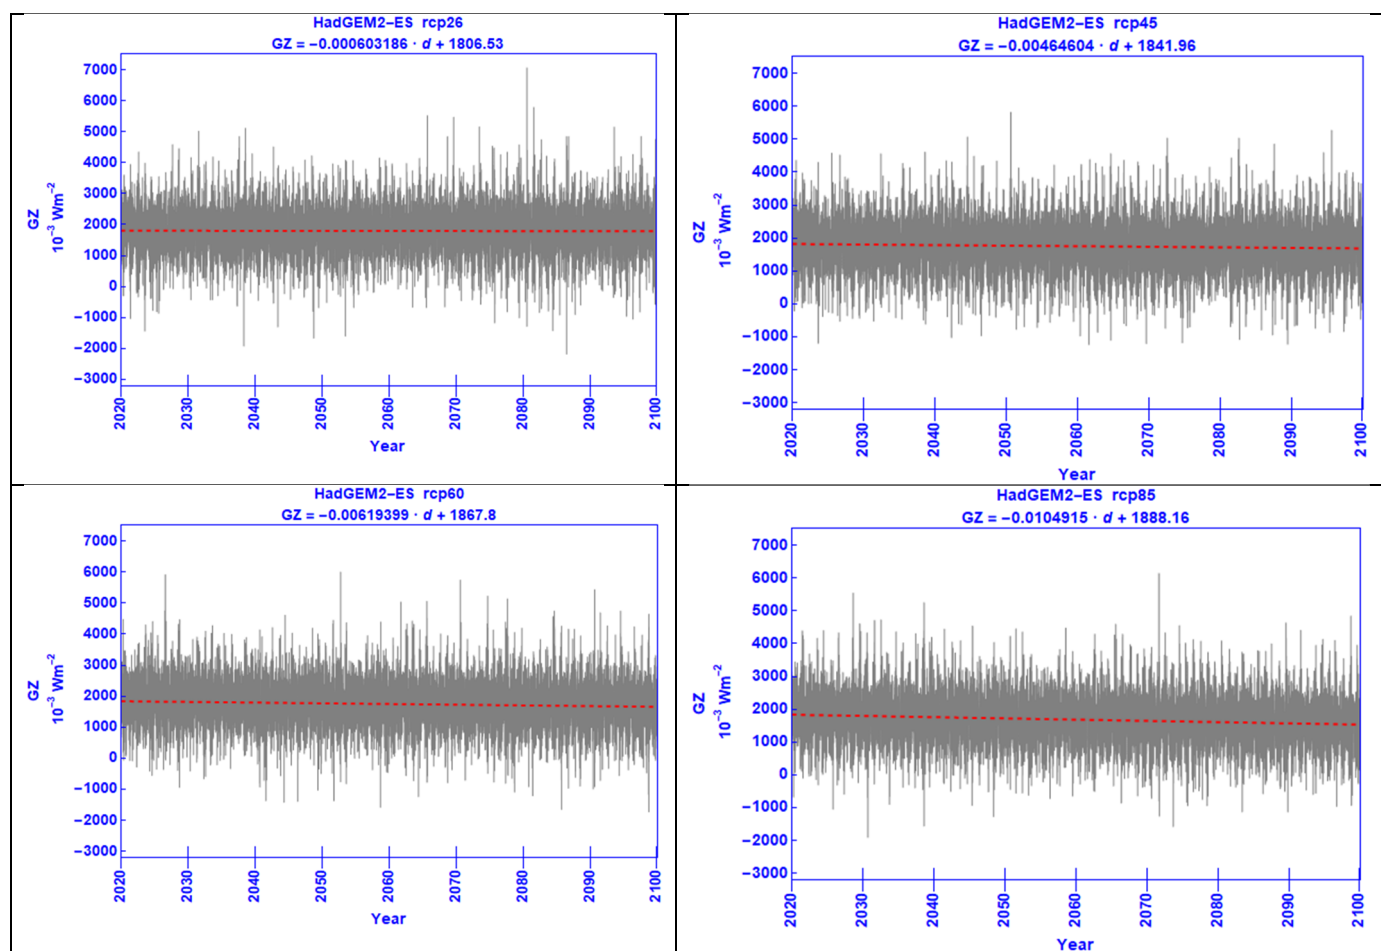

Time series for GZ corresponding to each Representative Concentration Pathway: rcp26 (top left), rcp45 (top right), rcp60 (bottom left, and rcp85 (bottom right). The fitted linear regression for this energy generation is given at the top of each diagram as a function of day ( $d$ ).

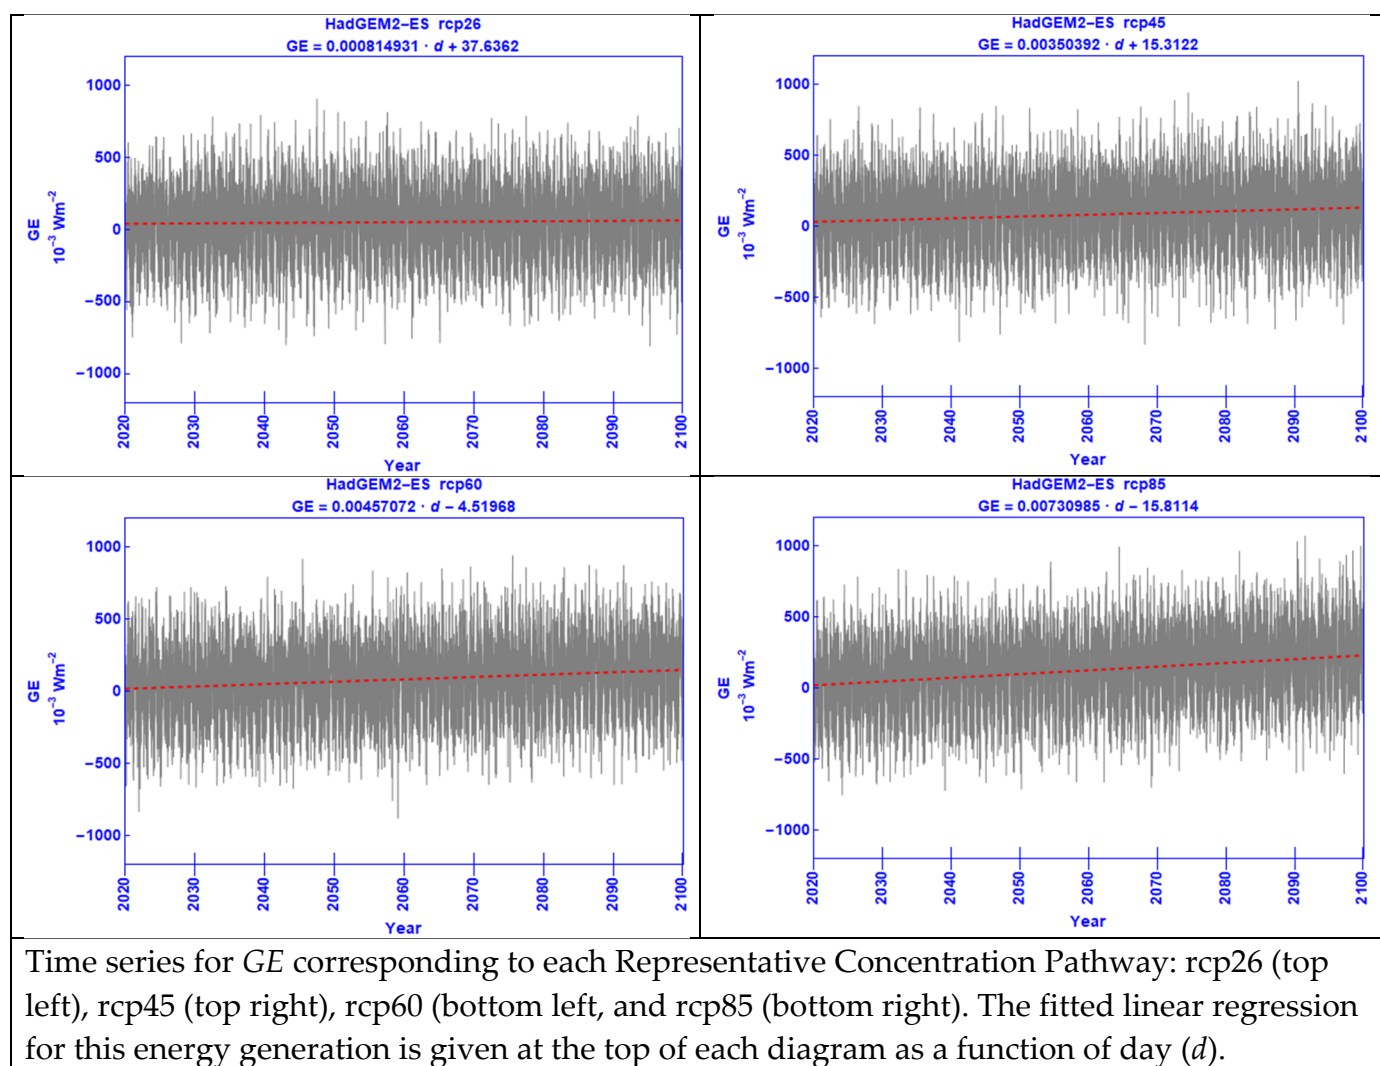

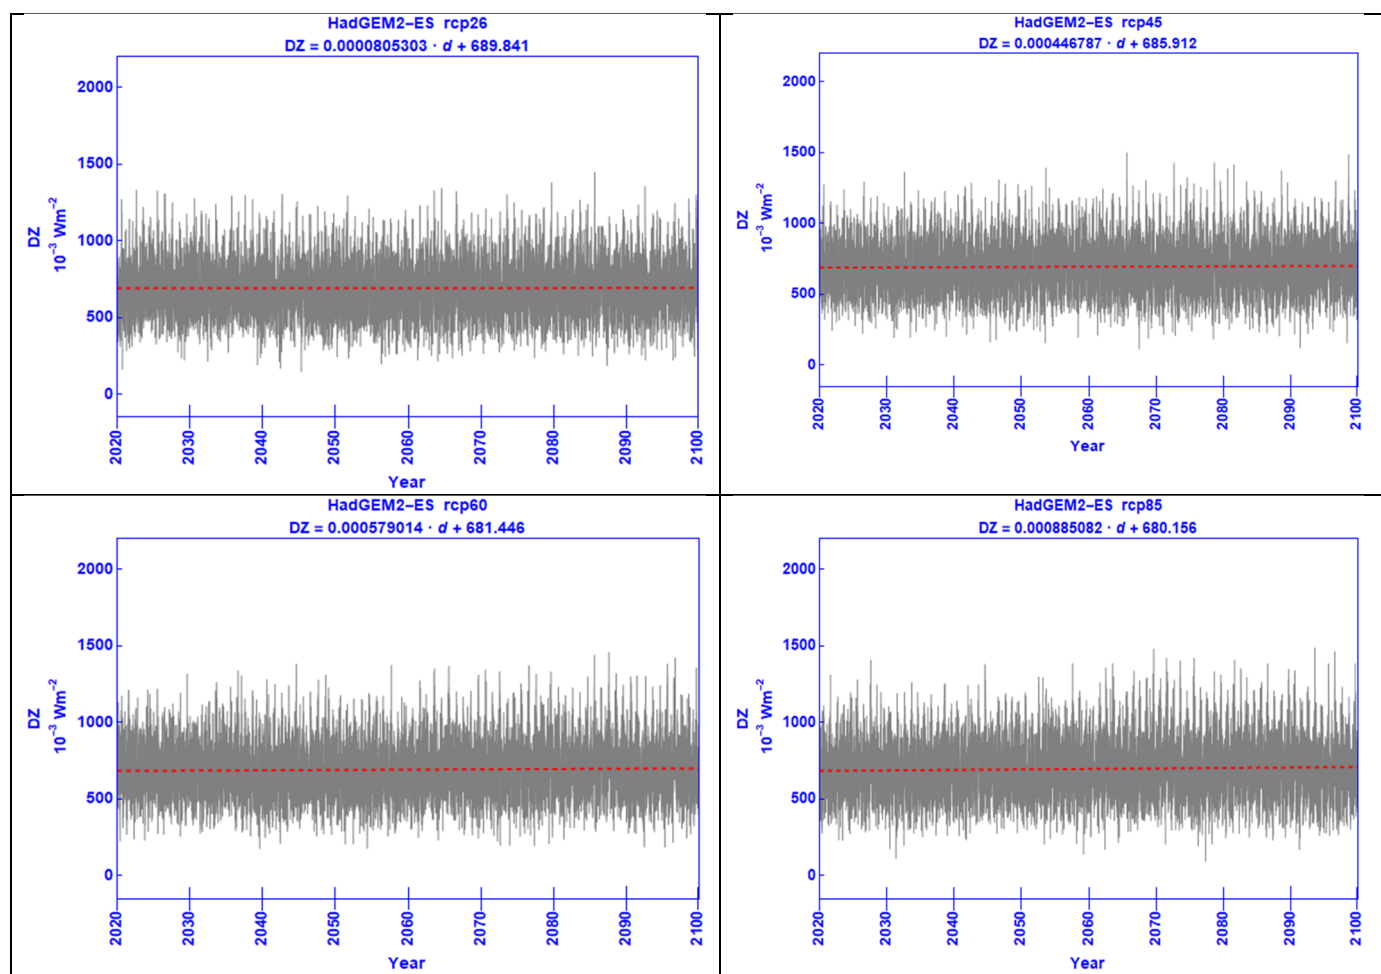

Time series for  $DZ$  corresponding to each Representative Concentration Pathway: rcp26 (top left), rcp45 (top right), rcp60 (bottom left, and rcp85 (bottom right). The fitted linear regression for this energy dissipation is given at the top of each diagram as a function of day ( $d$ ).

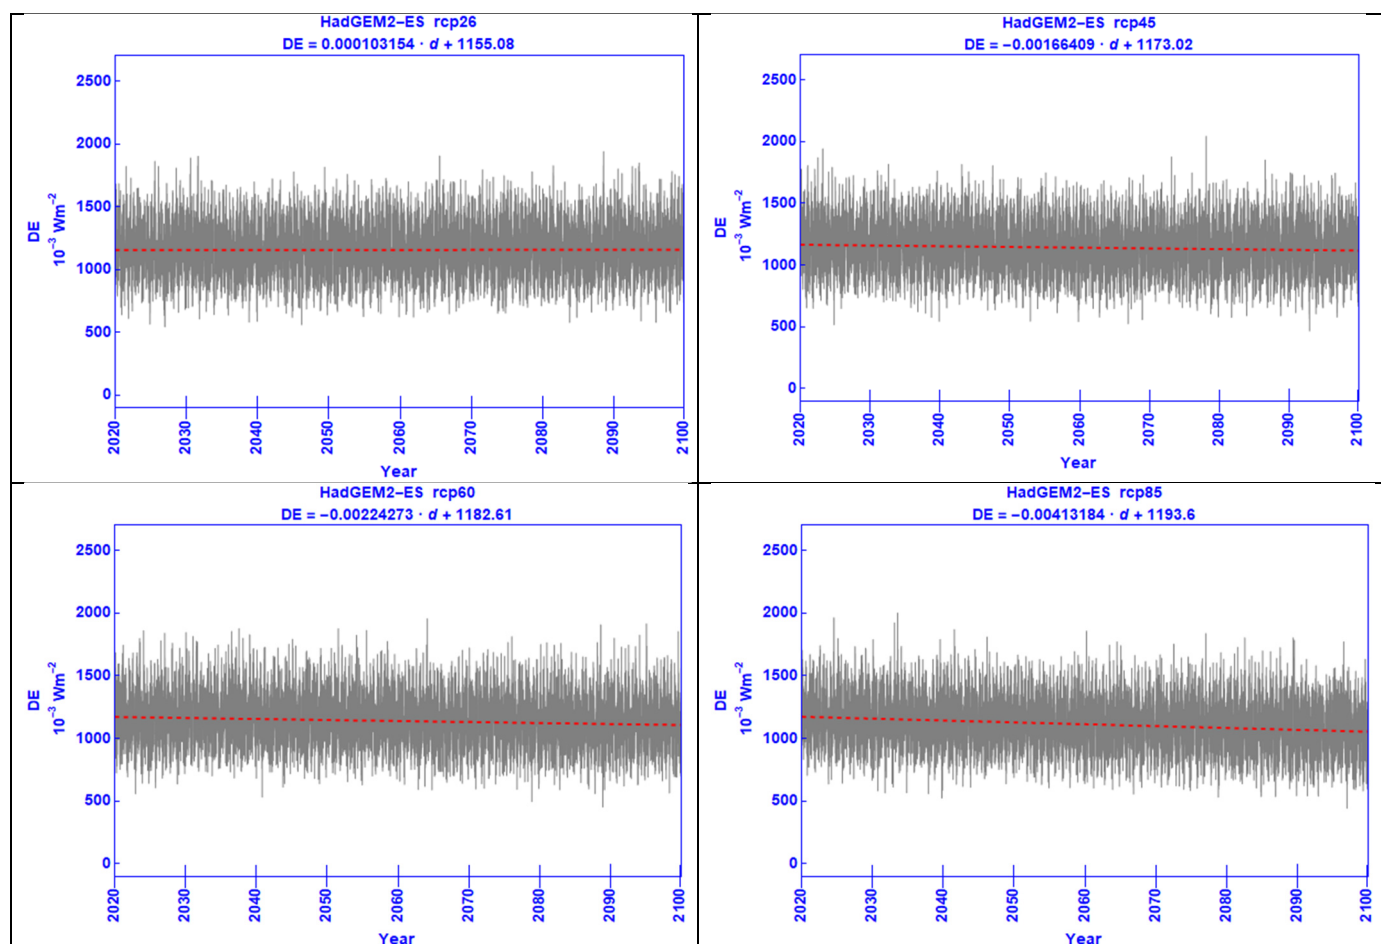

Time series for  $DE$  corresponding to each Representative Concentration Pathway: rcp26 (top left), rcp45 (top right), rcp60 (bottom left), and rcp85 (bottom right). The fitted linear regression for this energy dissipation is given at the top of each diagram as a function of day ( $d$ ).



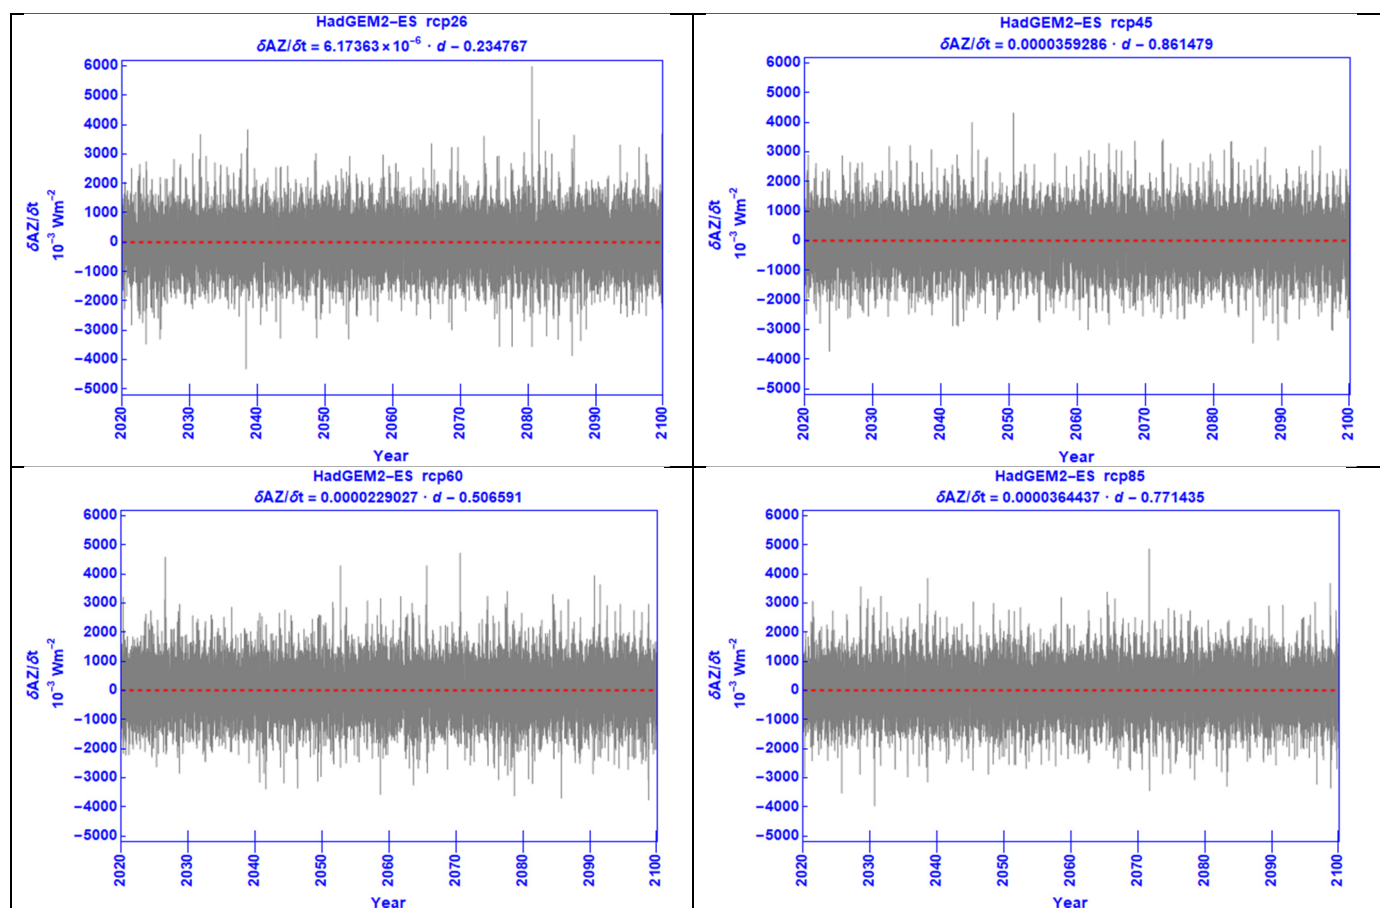

Time series for  $\Delta AZ/\Delta t$  corresponding to each Representative Concentration Pathway: rcp26 (top left), rcp45 (top right), rcp60 (bottom left), and rcp85 (bottom right). The fitted linear regression for this energy rate of change is given at the top of each diagram as a function of day ( $d$ ).

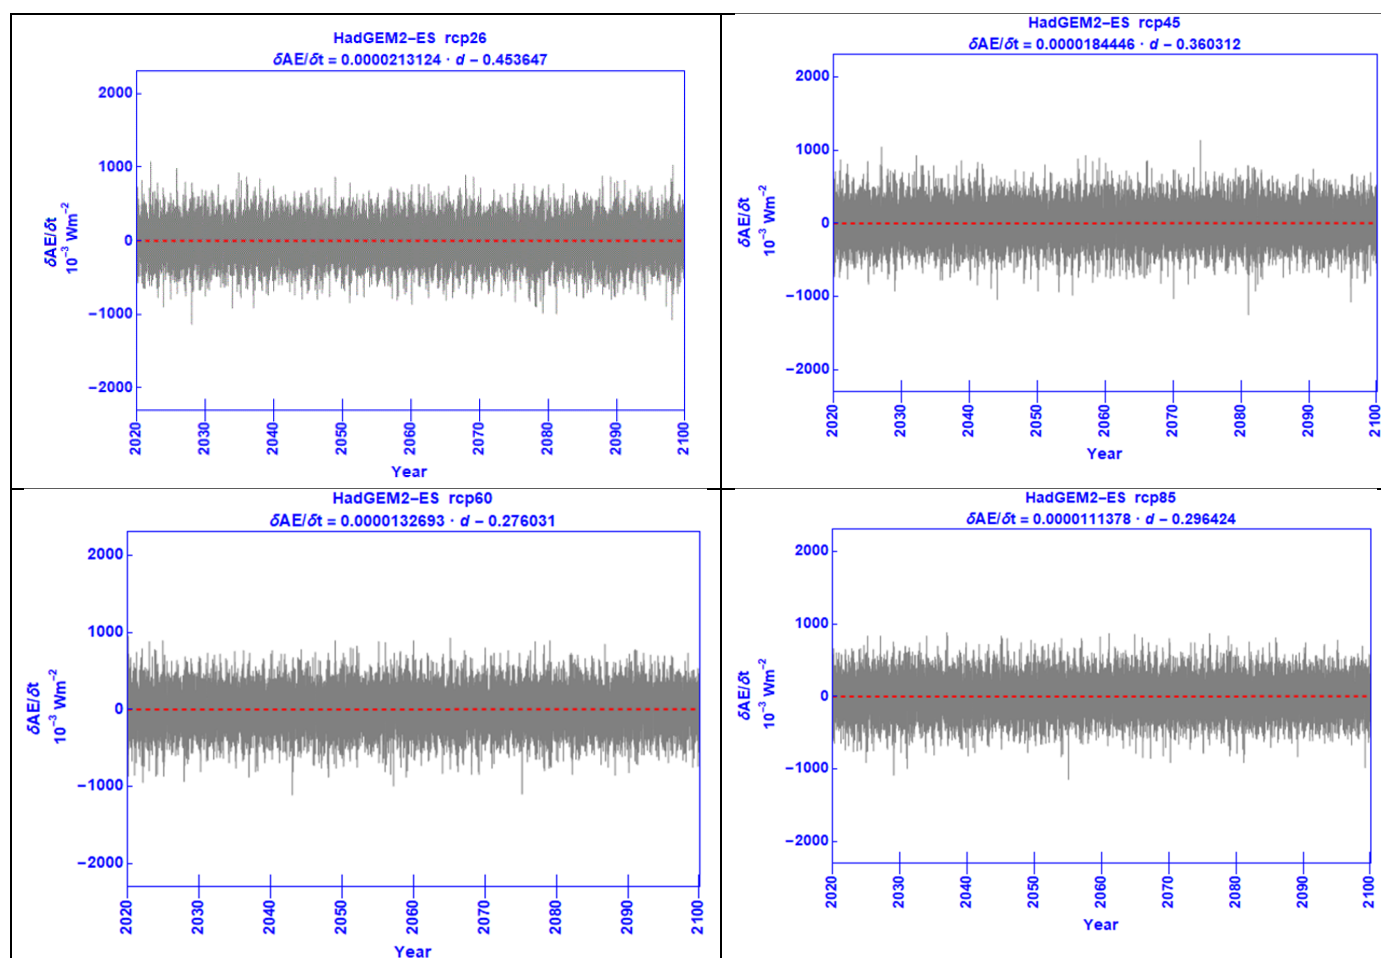

Time series for  $\partial AE/\partial t$  corresponding to each Representative Concentration Pathway: rcp26 (top left), rcp45 (top right), rcp60 (bottom left, and rcp85 (bottom right). The fitted linear regression for this energy rate of change is given at the top of each diagram as a function of day ( $d$ ).

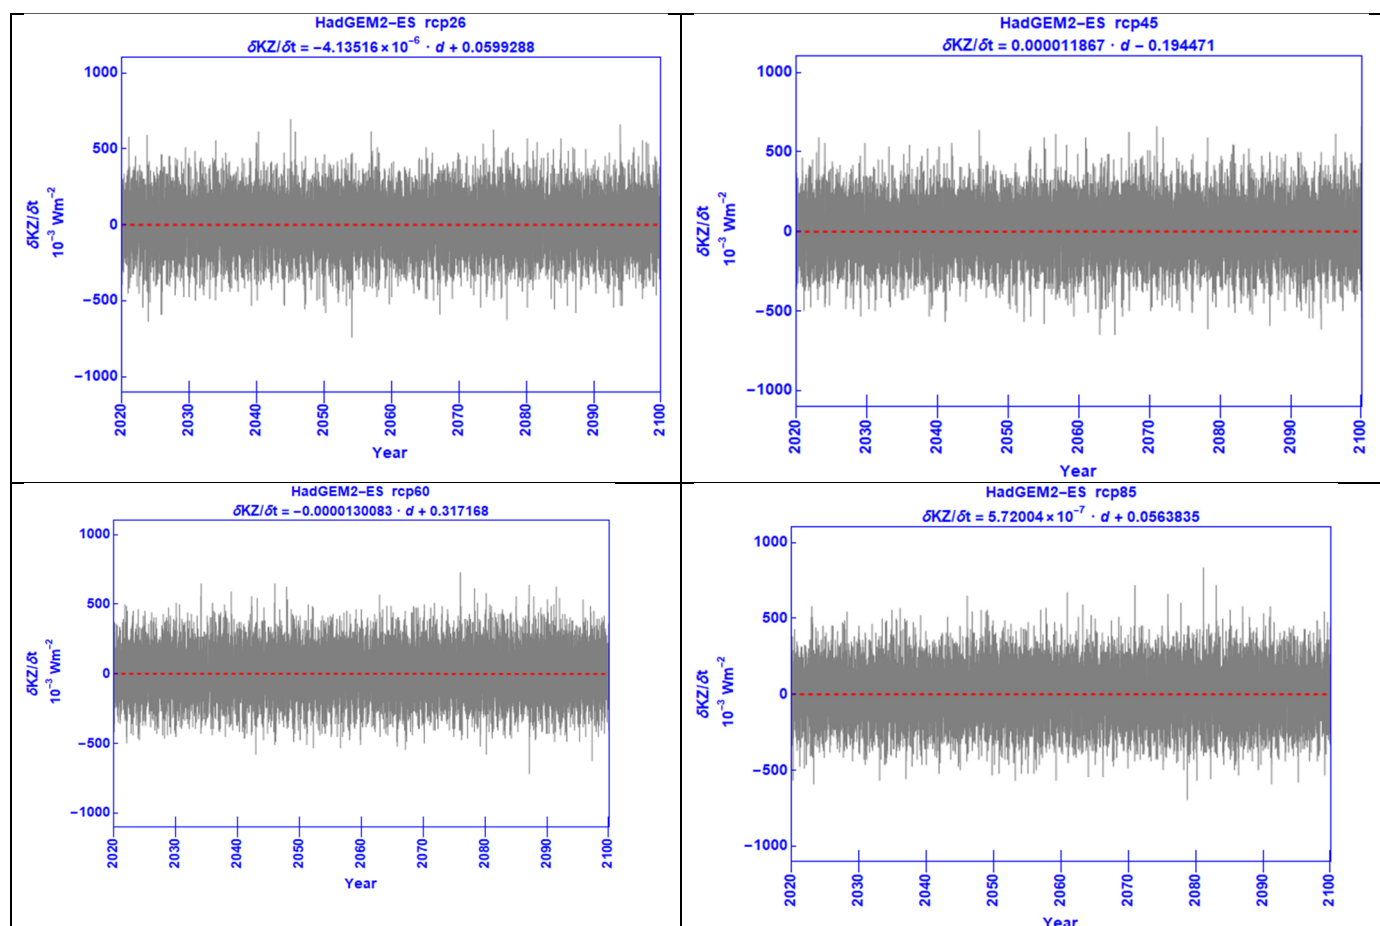

Time series for  $\partial KZ/\partial t$  corresponding to each Representative Concentration Pathway: rcp26 (top left), rcp45 (top right), rcp60 (bottom left, and rcp85 (bottom right). The fitted linear regression for this energy rate of change is given at the top of each diagram as a function of day ( $d$ ).

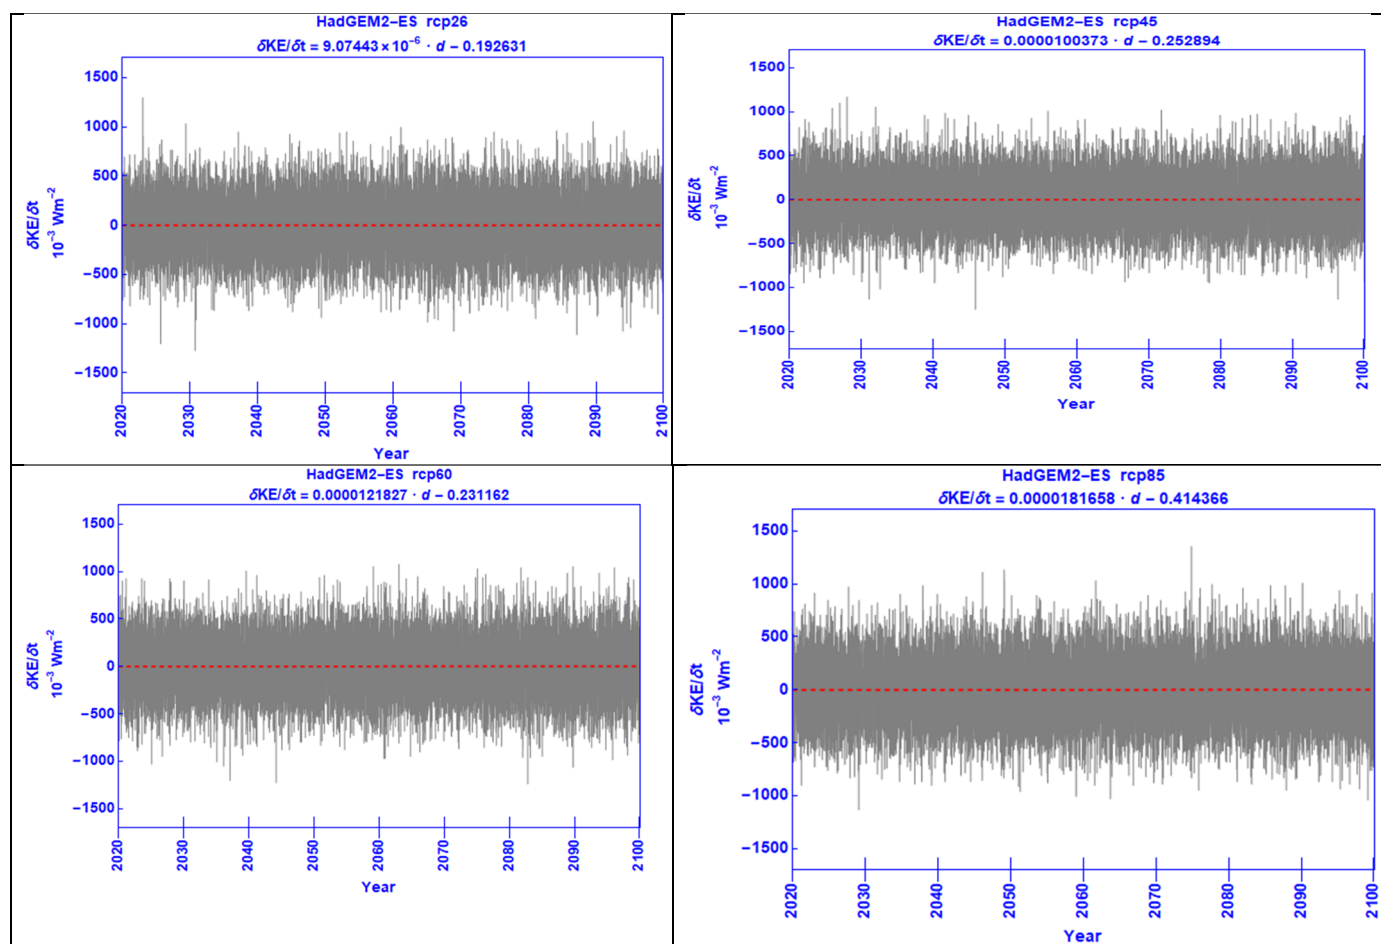

Time series for  $\partial KE / \partial t$  corresponding to each Representative Concentration Pathway: rcp26 (top left), rcp45 (top right), rcp60 (bottom left, and rcp85 (bottom right). The fitted linear regression for this energy rate of change is given at the top of each diagram as a function of day ( $d$ ).
